# Supplementary material
Source: PubMed Central journal article supplement (PMC6765388)
Supplement: NIHMS1050244-supplement-supp.pdf [file NIHMS1050244-supplement-supp.pdf]

## Electronic Supplementary Information

**Table 1. Parameters used in the simulations**

| Parameter    | Value                                              | Meaning                | Comments                                                                                                                               |
|--------------|----------------------------------------------------|------------------------|----------------------------------------------------------------------------------------------------------------------------------------|
| $R$          | 10 $\mu\text{m}$                                   | cell radius            | Measured average value for MDA-MB-231 and BT-20 cell lines                                                                             |
| $\gamma$     | 5.7...22.8 Hz                                      | shear rate             | Simulated shear rate at cell center when rolling on a surface (flow rate dependent)                                                    |
| $T_a$        | 293 K                                              | ambient temperature    | Experimental room temperature                                                                                                          |
| $\eta$       | 1 mPa·s                                            | dynamic viscosity      | 1×CMF-PBS medium                                                                                                                       |
| $\Delta\rho$ | 34 kg/m <sup>3</sup>                               | density difference     | Estimated based on measured terminal velocity of cell sedimentation                                                                    |
| $k_{on}$     | 0.0137 Hz                                          | on rate                | <i>Ref.</i> [33]                                                                                                                       |
| $k_0$        | $3 \times 10^{-4}$ Hz                              | unstressed off rate    | <i>Ref.</i> [40]                                                                                                                       |
| $x_c$        | 2e-11 m                                            | reactive compliance    | <i>Ref.</i> [12]                                                                                                                       |
| $D$          | 0.05...5 $\mu\text{m}$                             | Ligand-ligand distance | 0.05 $\mu\text{m}$ corresponds to the antibody concentration of 100 $\mu\text{g}/\text{ml}$ , consistent with <i>Ref.</i> [13, 18, 39] |
| $N_R$        | $2 \times 10^6 \dots 2 \times 10^{10}/\text{cm}^2$ | receptor density       | EpCAM receptor density                                                                                                                 |
| $r_0$        | $h+50$ nm                                          | capture radius         | <i>Ref.</i> [12]                                                                                                                       |
| $\Delta t$   | 0.004...0.02s                                      | time step              |                                                                                                                                        |
| $h$          | 490nm                                              | cell-surface gap       | determined by fitting with experimental data                                                                                           |
| $K$          | 850nN/m                                            | bond spring constant   | determined by fitting with experimental data                                                                                           |
